# Supplementary material
Source: PubMed Central journal article supplement (PMC5005074)

E

D

C

A

B

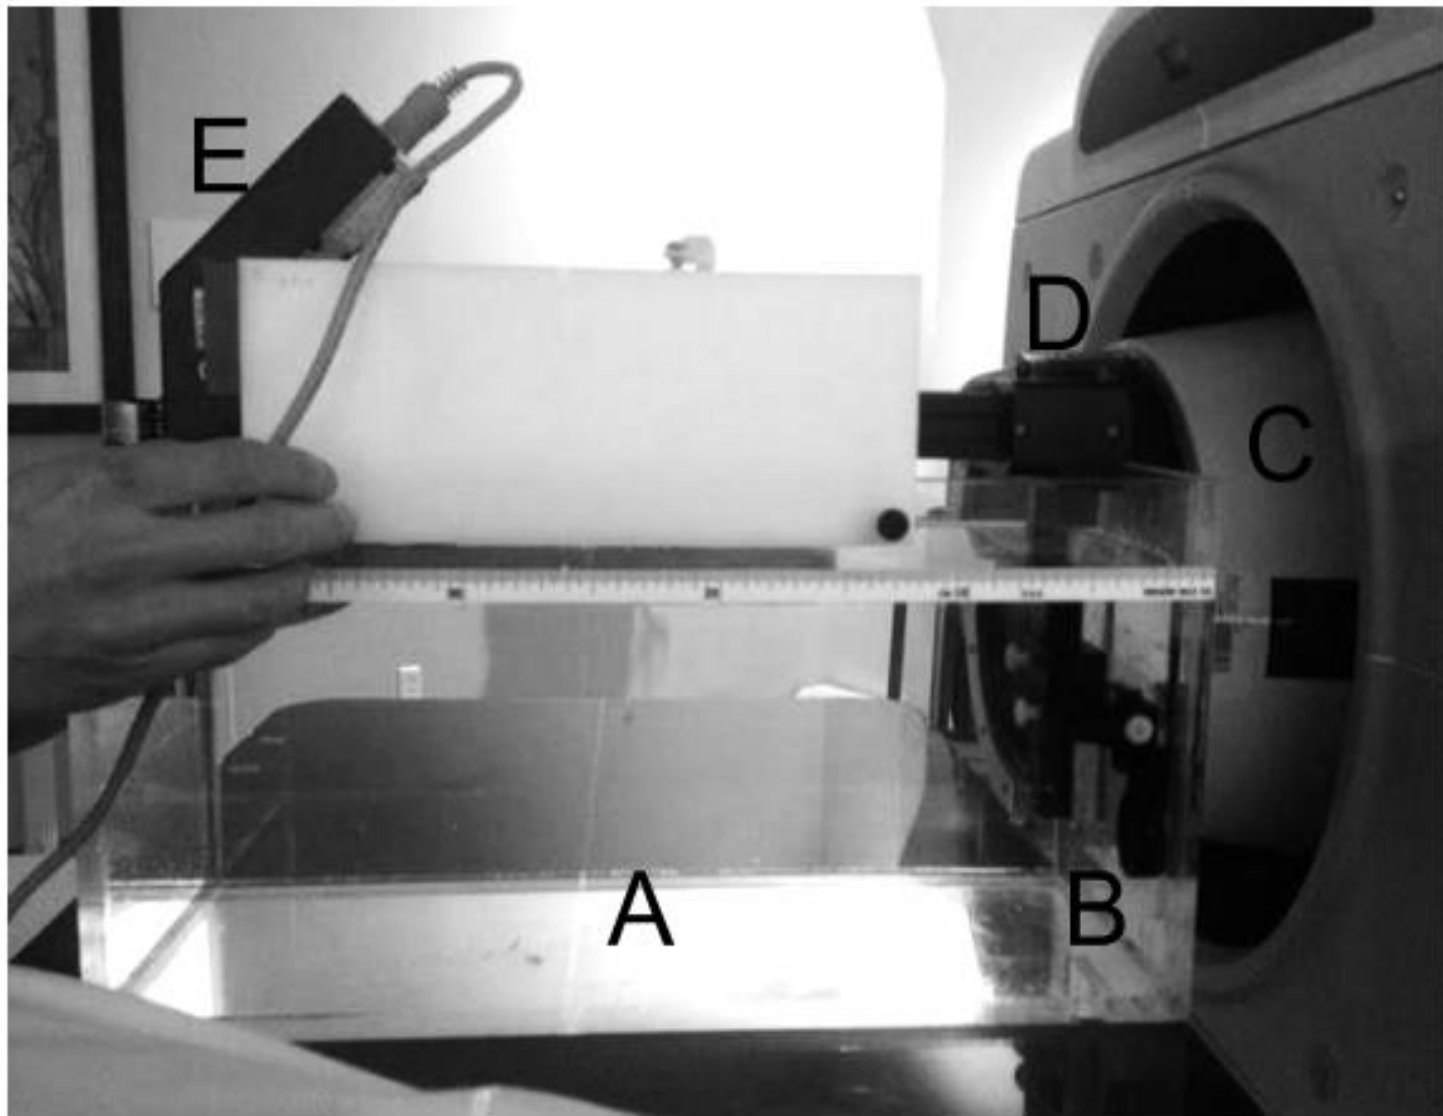

Supplement: NIHMS806026-supplement-2.pdf [file NIHMS806026-supplement-2.pdf]

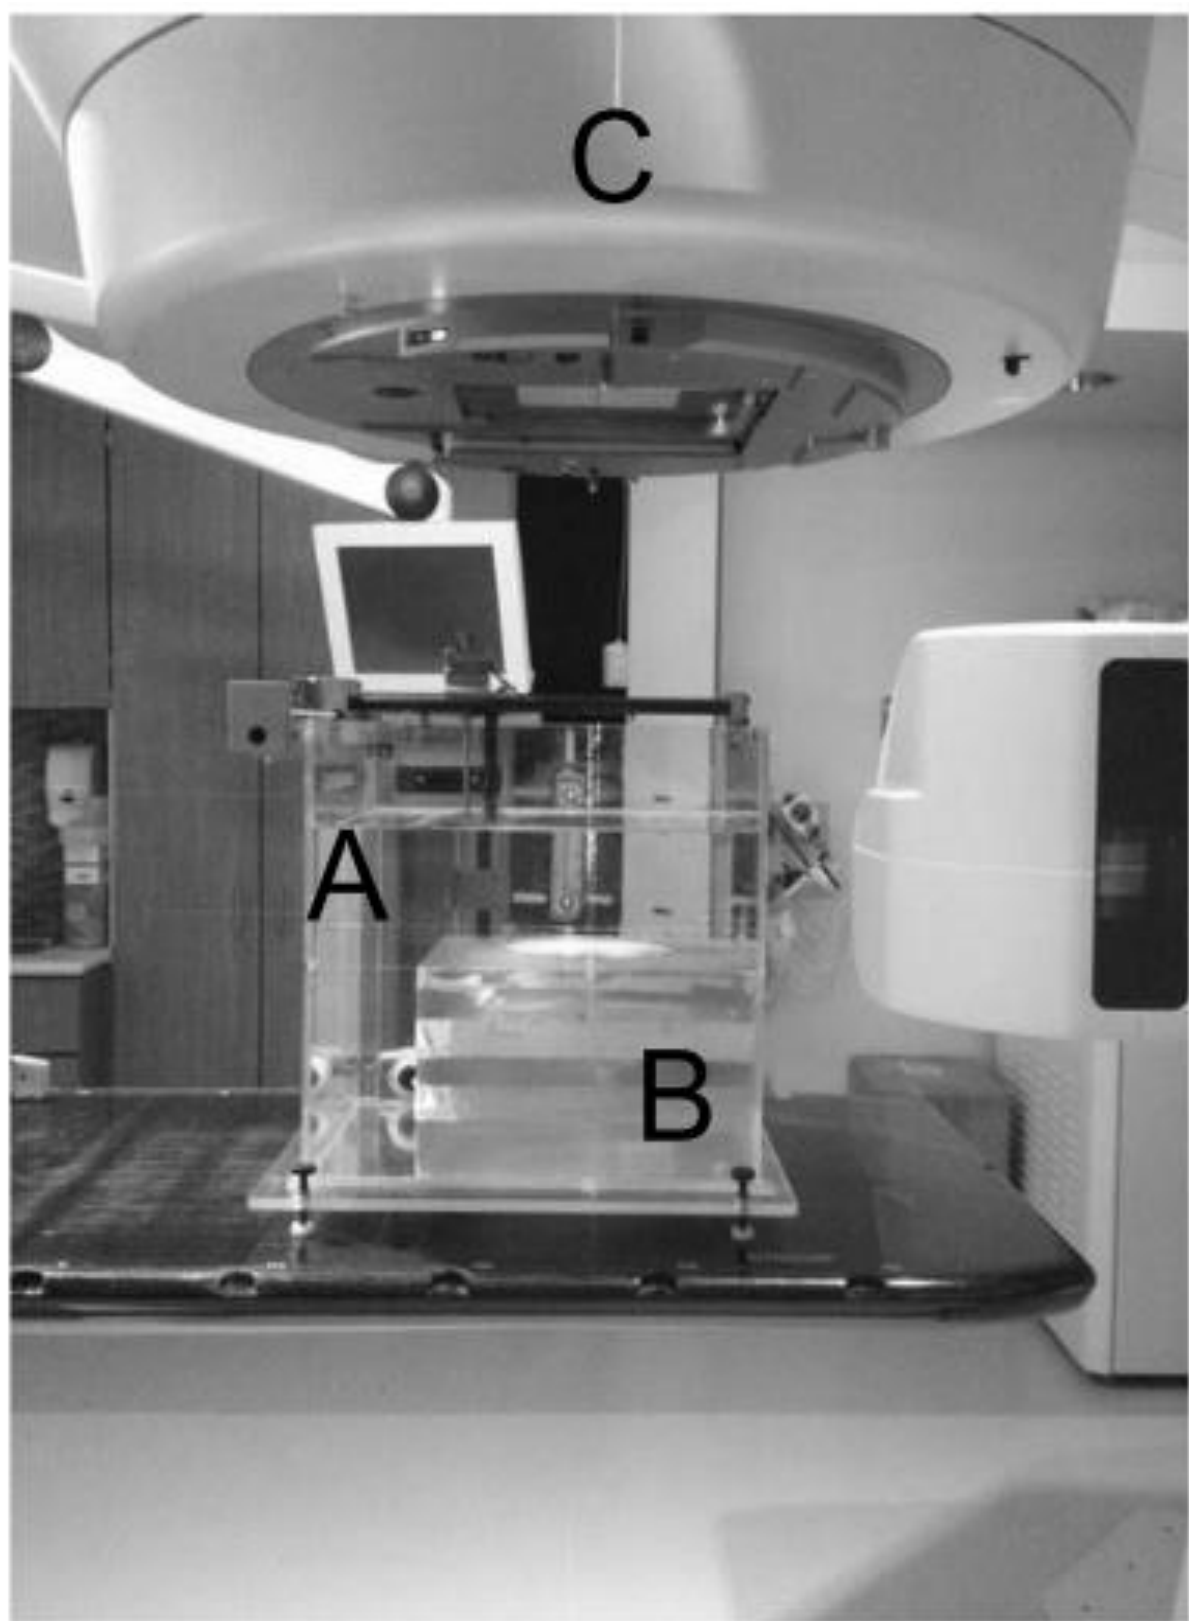

Supplement: NIHMS806026-supplement-3.pdf [file NIHMS806026-supplement-3.pdf]
